## Retraction: MicroRNA-216a inhibits the metastasis of gastric cancer cells by targeting JAK2/STAT3-mediated EMT process

Youmao Tao<sup>1</sup>, Songbai Yang<sup>2</sup>, Yuanyu Wu<sup>1</sup>, Xuedong Fang<sup>1</sup>, Yannan Wang<sup>1</sup>, Yan Song<sup>1</sup> and Tao Han<sup>2</sup>

<sup>1</sup>Department of Gastrointestinal Colorectal and Anal Surgery, China-Japan Union Hospital of Jilin University, Changchun, Jilin Province 130033, China

<sup>2</sup>Department of Vascular Surgery, China-Japan Union Hospital of Jilin University, Changchun, Jilin Province 130033, China

**Published:** March 10, 2025

**Copyright:** © 2025 Tao et al. This is an open access article distributed under the terms of the [Creative Commons Attribution License](#) (CC BY 4.0), which permits unrestricted use, distribution, and reproduction in any medium, provided the original author and source are credited.

**This article has been retracted:** Oncotarget has completed its investigation of this paper, where it was verified that several figure images were duplicated from previously published papers. In particular, the wound healing assay images in Figure 2 (panels B and E) and Figures 7B and 8B are duplicates of wound healing assay images from four different earlier papers [1–4]. Transwell assay images in Figure 2, panels C and F, and in Figures 7C and 8C were found to be duplicates of transwell assay images in another earlier article that has since been retracted [5]. Figures 4A, 5C, 6 and 7A duplicate numerous western blot images from unrelated papers [6–8], one of which has since been retracted [8]. And Figure 6 has reused western blot images from Figure 5C and from earlier paper from the same lab [9]. The authors have been unresponsive in our attempts to contact them for more information regarding these duplications. As a result, the Editorial decision was made to retract this paper.

Original article: Oncotarget. 2017; 8:88870–88881. <https://doi.org/10.18632/oncotarget.21488>

### REFERENCES

1. Sun M, Liu XH, Lu KH, Nie FQ, Xia R, Kong R, Yang JS, Xu TP, Liu YW, Zou YF, Lu BB, Yin R, Zhang EB, et al. EZH2-mediated epigenetic suppression of long noncoding RNA SPRY4-IT1 promotes NSCLC cell proliferation and metastasis by affecting the epithelial-mesenchymal transition. *Cell Death Dis.* 2014; 5:e1298. <https://doi.org/10.1038/cddis.2014.256>. [PubMed]
2. Sun M, Liu XH, Wang KM, Nie FQ, Kong R, Yang JS, Xia R, Xu TP, Jin FY, Liu ZJ, Chen JF, Zhang EB, De W, Wang ZX. Downregulation of BRAF activated non-coding RNA is associated with poor prognosis for non-small cell lung cancer and promotes metastasis by affecting epithelial-mesenchymal transition. *Mol Cancer.* 2014; 13:68. <https://doi.org/10.1186/1476-4598-13-68>. [PubMed]
3. Qu Y, Chen Q, Lai X, Zhu C, Chen C, Zhao X, Deng R, Xu M, Yuan H, Wang Y, Yu J, Huang J. SUMOylation of Grb2 enhances the ERK activity by increasing its binding with Sos1. *Mol Cancer.* 2014; 13:95. <https://doi.org/10.1186/1476-4598-13-95>. [PubMed]
4. Yu DL, Zhang T, Wu K, Li Y, Wang J, Chen J, Li XQ, Peng XG, Wang JN, Tan LG. MicroRNA-448 suppresses metastasis of pancreatic ductal adenocarcinoma through targeting JAK1/STAT3 pathway. *Oncol Rep.* 2017; 38:1075–82. <https://doi.org/10.3892/or.2017.5781>. [PubMed]. Retraction in: *Oncol Rep.* 2022; 48:209. <https://doi.org/10.3892/or.2022.8424>. [PubMed]
5. Pan T, Chen W, Yuan X, Shen J, Qin C, Wang L. miR-944 inhibits metastasis of gastric cancer by preventing the epithelial-mesenchymal transition via MACC1/Met/AKT signaling. *FEBS Open Bio.* 2017; 7:905–14. <https://doi.org/10.1002/2211-5463.12215>. [PubMed]. Retraction in: *FEBS Open Bio.* 2022; 12:2260. <https://doi.org/10.1002/2211-5463.13512>. [PubMed]
6. Sun XF, Sun JP, Hou HT, Li K, Liu X, Ge QX. MicroRNA-27b exerts an oncogenic function by targeting Fbxw7 in human hepatocellular carcinoma. *Tumour Biol.* 2016; 37:15325–32. <https://doi.org/10.1007/s13277-016-5444-9>. [PubMed]
7. Liu X, Yang L, Tu J, Cai W, Zhang M, Shou Z, Yao Y, Xu Q. microRNA-526b serves as a prognostic factor and exhibits tumor suppressive property by targeting Sirtuin 7 in hepatocellular carcinoma. *Oncotarget.* 2017; 8:87737–49. <https://doi.org/10.18632/oncotarget.21209>. [PubMed]

8. Wang X, Lin C, Zhao X, Liu A, Zhu J, Li X, Song L. Acylglycerol kinase promotes cell proliferation and tumorigenicity in breast cancer via suppression of the FOXO1 transcription factor. *Mol Cancer*. 2014; 13:106. <https://doi.org/10.1186/1476-4598-13-106>. [PubMed]
9. Tao Y, Han T, Zhang T, Ma C, Sun C. LncRNA CHRF-induced miR-489 loss promotes metastasis of colorectal cancer via TWIST1/EMT signaling pathway. *Oncotarget*. 2017; 8:36410–22. <https://doi.org/10.18632/oncotarget.16850>. [PubMed]
